# Supplementary material
Source: ML conference proceedings conference paper supplement (https://openaccess.thecvf.com/content/ICCV2021/html/Hendrycks_The_Many_Faces_ICCV_2021_paper.html)
Supplement: Supplementary file 1 [file Hendrycks_The_Many_Faces_ICCV_2021_supplemental.pdf]

# The Many Faces of Robustness: A Critical Analysis of Out-of-Distribution Generalization Supplementary Material

Dan Hendrycks<sup>1</sup>    Steven Basart<sup>2\*</sup>    Norman Mu<sup>1\*</sup>    Saurav Kadavath<sup>1</sup>    Frank Wang<sup>3</sup>  
Evan Dorundo<sup>3</sup>    Rahul Desai<sup>1</sup>    Tyler Zhu<sup>1</sup>    Samyak Parajuli<sup>1</sup>    Mike Guo<sup>1</sup>  
Dawn Song<sup>1</sup>    Jacob Steinhardt<sup>1</sup>    Justin Gilmer<sup>3</sup>

## A. Additional Results

**ImageNet-R.** Expanded ImageNet-R results are in Table 4. WSL pretraining on Instagram images appears to yield dramatic improvements on ImageNet-R, but the authors note the prevalence of artistic renditions of object classes on the Instagram platform. While ImageNet’s data collection process actively excluded renditions, we do not have reason to believe the Instagram dataset excluded renditions. On a ResNeXt-101  $32 \times 8d$  model, WSL pretraining improves ImageNet-R performance by a massive 37.5% from 57.5% top-1 error to 24.2%. Ultimately, without examining the training images we are unable to determine whether ImageNet-R represents an actual distribution shift to the Instagram WSL models. However, we also observe that with greater controls, that is with ImageNet-21K pre-training, pretraining hardly helped ImageNet-R performance, so it is not clear that more pre-training data improves ImageNet-R performance.

Increasing model size appears to automatically improve ImageNet-R performance, as shown in Figure 1. A ResNet-50 (25.5M parameters) has 63.9% error, while a ResNet-152 (60M) has 58.7% error. ResNeXt-50  $32 \times 4d$  (25.0M) attains 62.3% error and ResNeXt-101  $32 \times 8d$  (88M) attains 57.5% error.

**ImageNet-C.** Expanded ImageNet-C results are Table 3. We also tested whether model size improves performance on ImageNet-C for even larger models. With a different code-base, we trained ResNet-50, ResNet-152, and ResNet-500 models which achieved 80.6, 74.0, and 68.5 mCE respectively. Expanded comparisons between ImageNet-C and Real Blurry Images is in Table 1.

**ImageNet-A.** ImageNet-A [5] is an adversarially filtered test set and is constructed based on existing model weaknesses (see [9] for another robustness dataset algorithmically determined by model weaknesses). This dataset contains examples that are difficult for a ResNet-50 to classify, so examples solvable by simple spurious cues are especially infrequent in this dataset. Results are in Table 5. Notice Res2Net architectures [2] can greatly improve accuracy.

\*Equal contribution.

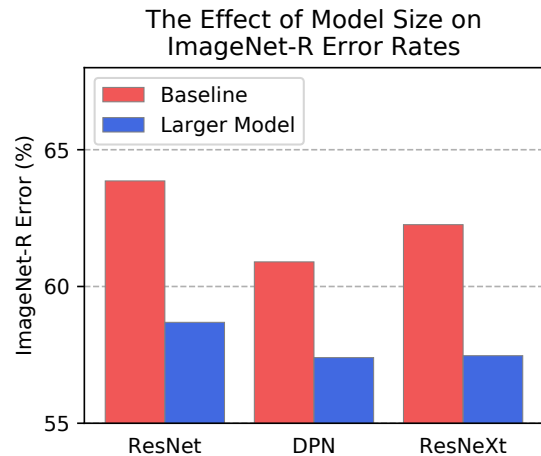

Figure 1: Larger models improve robustness on ImageNet-R. The baseline models are ResNet-50, DPN-68, and ResNeXt-50 ( $32 \times 4d$ ). The larger models are ResNet-152, DPN-98, and ResNeXt-101 ( $32 \times 8d$ ). The baseline ResNeXt has a 7.1% ImageNet error rate, while the large has a 6.2% error rate.

Results also show that *Larger Models*, *Self-Attention*, and *Pretraining* help, while *Diverse Data Augmentation* usually does not help substantially.

### Implications for the Four Methods.

*Larger Models* help with ImageNet-C (+), ImageNet-A (+), ImageNet-R (+), yet does not markedly improve DFR (-) performance.

*Self-Attention* helps with ImageNet-C (+), ImageNet-A (+), yet does not help ImageNet-R (-) and DFR (-) performance.

*Diverse Data Augmentation* helps ImageNet-C (+), ImageNet-R (+), yet does not markedly improve ImageNet-A (-), DFR(-), nor SVSF (-) performance.

*Pretraining* helps with ImageNet-C (+), ImageNet-A (+), yet does not markedly improve DFR (-) nor ImageNet-R (-) performance.

| Network                             | Defocus<br>Blur | Glass<br>Blur | Motion<br>Blur | Zoom<br>Blur | ImageNet-C<br>Blur Mean | Real Blurry<br>Images |
|-------------------------------------|-----------------|---------------|----------------|--------------|-------------------------|-----------------------|
| ResNet-50                           | 61              | 73            | 61             | 64           | 65                      | 58.7                  |
| + ImageNet-21K <i>Pretraining</i>   | 56              | 69            | 53             | 59           | 59                      | 54.8                  |
| + CBAM ( <i>Self-Attention</i> )    | 60              | 69            | 56             | 61           | 62                      | 56.5                  |
| + $\gamma$ Adversarial Training     | 80              | 71            | 72             | 71           | 74                      | 71.6                  |
| + Speckle Noise                     | 57              | 68            | 60             | 64           | 62                      | 56.9                  |
| + Style Transfer                    | 57              | 68            | 55             | 64           | 61                      | 56.7                  |
| + AugMix                            | 52              | 65            | 46             | 51           | 54                      | 54.4                  |
| + DeepAugment                       | 48              | 60            | 51             | 61           | 55                      | 54.2                  |
| + DeepAugment+AugMix                | 41              | 53            | 39             | 48           | 45                      | 51.7                  |
| ResNet-152 ( <i>Larger Models</i> ) | 67              | 81            | 66             | 74           | 58                      | 54.3                  |

Table 1: ImageNet-C Blurs (Defocus, Glass, Motion, Zoom) vs Real Blurry Images. All values are error rates and percentages. The rank orderings of the models on Real Blurry Images are similar to the rank orderings for “ImageNet-C Blur Mean,” so ImageNet-C’s simulated blurs track real-world blur performance.

| Hypothesis                       | ImageNet-C | Real Blurry Images | ImageNet-A | ImageNet-R | DFR | SVSF |
|----------------------------------|------------|--------------------|------------|------------|-----|------|
| <i>Larger Models</i>             | +          | +                  | +          | +          | –   |      |
| <i>Self-Attention</i>            | +          | +                  | +          | –          | –   |      |
| <i>Diverse Data Augmentation</i> | +          | +                  | –          | +          | –   | –    |
| <i>Pretraining</i>               | +          | +                  | +          | –          | –   |      |

Table 2: A highly simplified account of each method when tested against different datasets. This table includes ImageNet-A results.

## B. DeepAugment Details

**Pseudocode.** Below is Pythonic pseudocode for DeepAugment. The basic structure of DeepAugment is agnostic to the backbone network used, but specifics such as which layers are chosen for various transforms may vary as the backbone architecture varies. We do not need to train many different image-to-image models to get diverse distortions [10, 6]. We only use two existing models, the EDSR super-resolution model [7] and the CAE image compression model [8]. See full code for such details.

At a high level, DeepAugment processes each image with an image-to-image network. The image-to-image network’s weights and feedforward activations are distorted with each pass. The distortion is made possible by, for example, negating the network’s weights and applying dropout to the feedforward activations. These modifications were not carefully chosen and demonstrate the utility of mixing together diverse operations without tuning. The resulting image is distorted and saved. This process generates an augmented dataset.

**Ablations.** We run ablations on DeepAugment to understand the contributions from the EDSR and CAE models independently. Table 7 contains results of these experiments on ImageNet-R and Table 6 contains results of these experiments on ImageNet-C. In both tables, “DeepAugment (EDSR)” and “DeepAugment (CAE)” refer to experiments

where we only use a single extra augmented training set (+ the standard training set), and train on those images.

**Noise2Net.** We show that untrained, randomly sampled neural networks can provide useful deep augmentations, highlighting the efficacy of the DeepAugment approach. While in the main paper we use EDSR and CAE to create DeepAugment augmentations, in this section we explore the use of randomly initialized image-to-image networks to generate diverse image augmentations. We propose a DeepAugment method, *Noise2Net*.

In Noise2Net, the architecture and weights are randomly sampled. Noise2Net is the composition of several residual blocks:  $\text{Block}(x) = x + \theta \cdot f(x)$ , where  $\theta$  is randomly initialized and  $\theta$  is a parameter that controls the strength of the augmentation. For all our experiments, we use 4 Res2Net blocks [3] and  $\theta \sim U(0.375; 0.75)$ . The weights of Noise2Net are resampled at every minibatch, and the dilation and kernel sizes of all the convolutions used in Noise2Net are randomly sampled every epoch. Hence Noise2Net augments an image to an augmented image by processing the image through a randomly sampled network with random weights.

Recall that in the case of EDSR and CAE, we used networks to generate a static dataset, and then we trained normally on that static dataset. This setup could not be done on-the-fly. That is because we fed in one example at a time with EDSR and CAE. If we pass the entire minibatch through

|                                      | Clean | mCE  | Noise  |      |         | Blur    |       |        |      | Weather |       |     |        | Digital  |         |       |      |
|--------------------------------------|-------|------|--------|------|---------|---------|-------|--------|------|---------|-------|-----|--------|----------|---------|-------|------|
|                                      |       |      | Gauss. | Shot | Impulse | Defocus | Glass | Motion | Zoom | Snow    | Frost | Fog | Bright | Contrast | Elastic | Pixel | JPEG |
| ResNet-50                            | 23.9  | 76.7 | 80     | 82   | 83      | 75      | 89    | 78     | 80   | 78      | 75    | 66  | 57     | 71       | 85      | 77    | 77   |
| + ImageNet-21K Pretraining           | 22.4  | 65.8 | 61     | 64   | 63      | 69      | 84    | 68     | 74   | 69      | 71    | 61  | 53     | 53       | 81      | 54    | 63   |
| + SE (Self-Attention)                | 22.4  | 68.2 | 63     | 66   | 66      | 71      | 82    | 67     | 74   | 74      | 72    | 64  | 55     | 71       | 73      | 60    | 67   |
| + CBAM (Self-Attention)              | 22.4  | 70.0 | 67     | 68   | 68      | 74      | 83    | 71     | 76   | 73      | 72    | 65  | 54     | 70       | 79      | 62    | 67   |
| + $\ell_\infty$ Adversarial Training | 46.2  | 94.0 | 91     | 92   | 95      | 97      | 86    | 92     | 88   | 93      | 99    | 118 | 104    | 111      | 90      | 72    | 81   |
| + Speckle Noise                      | 24.2  | 68.3 | 51     | 47   | 55      | 70      | 83    | 77     | 80   | 76      | 71    | 66  | 57     | 70       | 82      | 72    | 69   |
| + Style Transfer                     | 25.4  | 69.3 | 66     | 67   | 68      | 70      | 82    | 69     | 80   | 68      | 71    | 65  | 58     | 66       | 78      | 62    | 70   |
| + AugMix                             | 22.5  | 65.3 | 67     | 66   | 68      | 64      | 79    | 59     | 64   | 69      | 68    | 65  | 54     | 57       | 74      | 60    | 66   |
| + DeepAugment                        | 23.3  | 60.4 | 49     | 50   | 47      | 59      | 73    | 65     | 76   | 64      | 60    | 58  | 51     | 61       | 76      | 48    | 67   |
| + DeepAugment + AugMix               | 24.2  | 53.6 | 46     | 45   | 44      | 50      | 64    | 50     | 61   | 58      | 57    | 54  | 52     | 48       | 71      | 43    | 61   |
| ResNet-152 (Larger Models)           | 21.7  | 69.3 | 73     | 73   | 76      | 67      | 81    | 66     | 74   | 71      | 68    | 62  | 51     | 67       | 76      | 69    | 65   |
| ResNeXt-101 32 8d (Larger Models)    | 20.7  | 66.7 | 68     | 69   | 71      | 65      | 79    | 66     | 71   | 69      | 66    | 60  | 50     | 66       | 74      | 61    | 64   |
| + WSL Pretraining (1000 data)        | 17.8  | 51.7 | 49     | 50   | 51      | 53      | 72    | 55     | 63   | 53      | 51    | 42  | 37     | 41       | 67      | 40    | 51   |
| + DeepAugment + AugMix               | 20.1  | 44.5 | 36     | 35   | 34      | 43      | 55    | 42     | 55   | 48      | 48    | 47  | 43     | 39       | 59      | 34    | 50   |

Table 3: Clean Error, Corruption Error (CE), and mean CE (mCE) values for various models, and training methods on ImageNet-C. The mCE value is computed by averaging across all 15 CE values. A CE value greater than 100 (e.g. adversarial training on contrast) denotes worse performance than AlexNet. DeepAugment+AugMix improves robustness by over 23 mCE.

|                                               | ImageNet-200 (%) | ImageNet-R (%) | Gap  |
|-----------------------------------------------|------------------|----------------|------|
| ResNet-50 [4]                                 | 7.9              | 63.9           | 56.0 |
| + ImageNet-21K Pretraining (10 $\times$ data) | 7.0              | 62.8           | 55.8 |
| + CBAM (Self-Attention)                       | 7.0              | 63.2           | 56.2 |
| + $\ell_\infty$ Adversarial Training          | 25.1             | 68.6           | 43.5 |
| + Speckle Noise                               | 8.1              | 62.1           | 54.0 |
| + Style Transfer                              | 8.9              | 58.5           | 49.6 |
| + AugMix                                      | 7.1              | 58.9           | 51.8 |
| + DeepAugment                                 | 7.5              | 57.8           | 50.3 |
| + DeepAugment + AugMix                        | 8.0              | 53.2           | 45.2 |
| ResNet-101 (Larger Models)                    | 7.1              | 60.7           | 53.6 |
| + SE (Self-Attention)                         | 6.7              | 61.0           | 54.3 |
| ResNet-152 (Larger Models)                    | 6.8              | 58.7           | 51.9 |
| + SE (Self-Attention)                         | 6.6              | 60.0           | 53.4 |
| ResNeXt-101 32 $\times$ 4d (Larger Models)    | 6.8              | 58.0           | 51.2 |
| + SE (Self-Attention)                         | 5.9              | 59.6           | 53.7 |
| ResNeXt-101 32 $\times$ 8d (Larger Models)    | 6.2              | 57.5           | 51.3 |
| + WSL Pretraining (1000 $\times$ data)        | 4.1              | 24.2           | 20.1 |
| + DeepAugment + AugMix                        | 6.1              | 47.9           | 41.8 |

Table 4: ImageNet-200 and ImageNet-Renditions error rates. ImageNet-21K and WSL Pretraining are *Pretraining* methods, and pretraining gives mixed benefits. CBAM and SE are forms of *Self-Attention*, and these *hurt* robustness. ResNet-152 and ResNeXt-101 32 $\times$ 8d test the impact of using *Larger Models*, and these help. Other methods augment data, and Style Transfer, AugMix, and DeepAugment provide support for the *Diverse Data Augmentation*.

EDSR or CAE, we will end up applying the same augmentation to all images in the minibatch, reducing stochasticity and augmentation diversity. In contrast, Noise2Net enables us to process batches of images on-the-fly and obviates the need for creating a static augmented dataset.

In Noise2Net, each example is processed differently in parallel, so we generate more diverse augmentations in real-

time. To make this possible, we use grouped convolutions. A grouped convolution with number of groups =  $N$  will take a set of  $kN$  channels as input, and apply  $N$  independent convolutions on channels  $\{1;\dots;k\};\{k+1;\dots;2k\};\dots;\{(N-1)k+1;\dots;Nk\}$ . Given a minibatch of size  $B$ , we can apply a randomly initialized grouped convolution with  $N = B$  groups in order to apply a different random convolutional fil-

|                                                    | ImageNet-A (%) |
|----------------------------------------------------|----------------|
| ResNet-50                                          | 2.2            |
| + ImageNet-21K Pretraining (10 data)               | 11.4           |
| + Squeeze-and-Excitation (Self-Attention)          | 6.2            |
| + CBAM (Self-Attention)                            | 6.9            |
| + $\ell_1$ Adversarial Training                    | 1.7            |
| + Style Transfer                                   | 2.0            |
| + AugMix                                           | 3.8            |
| + DeepAugment                                      | 3.5            |
| + DeepAugment + AugMix                             | 3.9            |
| ResNet-152 (Larger Model)                          | 6.1            |
| ResNet-152+Squeeze-and-Excitation (Self-Attention) | 9.4            |
| Res2Net-50 v1b                                     | 14.6           |
| Res2Net-152 v1b (Larger Model)                     | 22.4           |
| ResNeXt-101 (28d) (Larger Model)                   | 10.2           |
| + WSL Pretraining (1000 data)                      | 45.4           |
| + DeepAugment + AugMix                             | 11.5           |

Table 5: ImageNet-A top-1 accuracy.

ter to each element in the batch in a single forward pass, replacing all the convolutions in each Res2Net block with a grouped convolution and randomly initializing network weights, we arrive at Noise2Net, a variant of DeepAugment. See Figure 2 for a high-level overview of Noise2Net; Figure 3 for sample outputs.

We evaluate the Noise2Net variant of DeepAugment on ImageNet-R. Table 7 shows that it outperforms the EL and CAE variants of DeepAugment, even though the network architecture is randomly sampled, its weights are random, and the network is not trained. This demonstrates the flexibility of the DeepAugment approach. Below is Python pseudocode for training a classifier using the Noise2Net variant of DeepAugment.

```

1 def main():
2     net.apply_weights(
3         deepAugment_getNetwork()) # EDSR, CAE
4     for image in dataset: # May be the
5         if np.random.uniform() < 0.05: #
6             Arbitrary refresh prob
7                 net.apply_weights(
8                     deepAugment_getNetwork())
9                 new_image = net.
10                    deepAugment_forwardPass(image)
11
12 def deepAugment_getNetwork():
13     weights = load_clean_weights()
14     weight_distortions =
15         sample_weight_distortions()
16     for d in weight_distortions:
17         weights = apply_distortion(d,
18             weights)
19     return weights
20
21 def sample_weight_distortions():
22     distortions = [
23         negate_weights,
24         zero_weights,
25         flip_transpose_weights,
26         ...
27     ]
28     return random_subset(distortions)
29
30 def sample_signal_distortions():
31     distortions = [
32         gelu,
33         negate_signal_random_mask,
34         flip_signal,
35         ...
36     ]
37     return random_subset(distortions)
38
39 class Network():
40     def apply_weights(weights):
41         ... # Apply given weight tensors
42         to network
43
44     # Clean forward pass. Compare to
45     deepAugment_forwardPass()
46     def clean_forwardPass(X):
47         X = network.block1(X)
48         X = network.block2(X)
49         ...
50         X = network.blockN(X)
51         return X
52
53     # Our forward pass. Compare to
54     clean_forwardPass()
55     def deepAugment_forwardPass(X):

```

```

50     # Returns a list of distortions,
each of which
51     # will be applied at a different
layer.
52     signal_distortions =
sample_signal_distortions()
53
54     X = network.block1(X)
55     apply_layer_1_distortions(X,
signal_distortions)
56     X = network.block2(X)
57     apply_layer_2_distortions(X,
signal_distortions)
58     ...
59     apply_layer_N = 1_distortions(X,
signal_distortions)
60     X = network.blockN(X)
61     apply_layer_N_distortions(X,
signal_distortions)
62
63     return X

1 def train_one_epoch(classifier,
batch_size, dataloader):
2     noise2net = Noise2Net(batch_size=
batch_size)
3     for batch, target in dataloader:
4         noise2net.reload_weights()
5         noise2net.set_epsilon(random.
uniform(0.375, 0.75))
6         logits = model(noise2net.forward(
batch))
7         ... # Calculate loss and backprop
8
9 def train():
10     for epoch in range(epochs):
11         train_one_epoch(classifier,
batch_size, dataloader)
12
13 class DeepAugment_Noise2Net:
14     def __init__(self, batch_size=5):
15         self.block1 = Res2NetBlock(
batch_size=batch_size)
16         self.block2 = Res2NetBlock(
batch_size=batch_size)
17         self.block3 = Res2NetBlock(
batch_size=batch_size)
18         self.block4 = Res2NetBlock(
batch_size=batch_size)
19
20     def reload_weights(self):
21         ... # Reload Network parameters
22
23     def set_epsilon(self, new_eps):
24         self.epsilon = new_eps
25
26     def forward(self, x):
27         x = x + self.block1(x) * self.
epsilon
28         x = x + self.block2(x) * self.
epsilon
29         x = x + self.block3(x) * self.
epsilon
30         x = x + self.block4(x) * self.
epsilon
31         return x

```

## C. Further Dataset Descriptions

ImageNet-R Classes. The 200 ImageNet classes and their WordNet IDs in ImageNet-R are as follows.

Gold sh, great white shark, hammerhead, stingray, hen, ostrich, gold nch, junco, bald eagle, vulture, newt, axolotl, tree frog, iguana, African chameleon, cobra, scorpion, tarantula, centipede, peacock, lorikeet, hummingbird, toucan, duck, goose, black swan, koala, jelly sh, snail, lobster, hermit crab, amingo, american egret, pelican, king penguin, grey whale, killer whale, sea lion, chihuahua, shih tzu, afghan hound, basset hound, beagle, bloodhound, italian greyhound, whippet, weimaraner, yorkshire terrier, boston terrier, scottish terrier, west highland white terrier, golden retriever, labrador retriever, cocker spaniels, collie, border collie, rottweiler, german shepherd dog, boxer, french bulldog, saint bernard, husky, dalmatian, pug, pomeranian, chow chow, pembroke welsh corgi, toy poodle, standard poodle, timber wolf, hyena, red fox, tabby cat, leopard, snow leopard, lion, tiger, cheetah, polar bear, meerkat, ladybug, y, bee, ant, grasshopper, cockroach, mantis, dragon y, monarch butter y, star sh, wood rabbit, porcupine, fox squirrel, beaver, guinea pig, zebra, pig, hippopotamus, bison, gazelle, llama, skunk, badger, orangutan, gorilla, chimpanzee, gibbon, baboon, panda, eel, clown sh, puffer sh, accordion, ambulance, assault ri e, backpack, barn, wheelbarrow, basket-ball, bathtub, lighthouse, beer glass, binoculars, birdhouse, bow tie, broom, bucket, cauldron, candle, cannon, canoe, carousel, castle, mobile phone, cowboy hat, electric guitar, re engine, ute, gasmask, grand piano, guillotine, hammer, harmonica, harp, hatchet, jeep, joystick, lab coat, lawn mower, lipstick, mailbox, missile, mitten, parachute, pickup truck, pirate ship, revolver, rugby ball, sandal, saxophone, school bus, schooner, shield, soccer ball, space shuttle, spider web, steam locomotive, scarf, submarine, tank, tennis ball, tractor, trombone, vase, violin, military aircraft, wine bottle, ice cream, bagel, pretzel, cheeseburger, hotdog, cabbage, broccoli, cucumber, bell pepper, mushroom, Granny Smith, strawberry, lemon, pineapple, banana, pomegranate, pizza, burrito, espresso, volcano, baseball player, scuba diver, acorn.

n01443537, n01484850, n01494475, n01498041,  
n01514859, n01518878, n01531178, n01534433,  
n01614925, n01616318, n01630670, n01632777,  
n01644373, n01677366, n01694178, n01748264,  
n01770393, n01774750, n01784675, n01806143,

|                      | Clean | Noise |        |      |         |         | Blur  |        |      |      | Weather |     |        |          | Digital |       |      |  |
|----------------------|-------|-------|--------|------|---------|---------|-------|--------|------|------|---------|-----|--------|----------|---------|-------|------|--|
|                      |       | mCE   | Gauss. | Shot | Impulse | Defocus | Glass | Motion | Zoom | Snow | Frost   | Fog | Bright | Contrast | Elastic | Pixel | JPEG |  |
| ResNet-50            | 23.9  | 76.7  | 80     | 82   | 83      | 75      | 89    | 78     | 80   | 78   | 75      | 66  | 57     | 71       | 85      | 77    | 77   |  |
| + DeepAugment (EDSR) | 23.5  | 64.0  | 56     | 57   | 54      | 64      | 77    | 71     | 78   | 68   | 64      | 64  | 55     | 64       | 78      | 46    | 67   |  |
| + DeepAugment (CAE)  | 23.2  | 67.0  | 58     | 60   | 62      | 62      | 75    | 73     | 77   | 68   | 66      | 60  | 52     | 66       | 80      | 63    | 78   |  |
| + DeepAugment (Both) | 23.3  | 60.4  | 49     | 50   | 47      | 59      | 73    | 65     | 76   | 64   | 60      | 58  | 51     | 61       | 76      | 48    | 67   |  |

Table 6: Clean Error, Corruption Error (CE), and mean CE (mCE) values for DeepAugment ablations on ImageNet-C. The mCE value is computed by averaging across all 15 CE values.

|                            | ImageNet-200 (%) | ImageNet-R (%) | Gap  |
|----------------------------|------------------|----------------|------|
| ResNet-50                  | 7.9              | 63.9           | 56.0 |
| + DeepAugment (EDSR)       | 7.9              | 60.3           | 55.1 |
| + DeepAugment (CAE)        | 7.6              | 58.5           | 50.9 |
| + DeepAugment (EDSR + CAE) | 7.5              | 57.8           | 50.3 |
| + DeepAugment (Noise2Net)  | 7.2              | 57.6           | 50.4 |
| + DeepAugment (All 3)      | 7.4              | 56.0           | 48.6 |

Table 7: DeepAugment ablations on ImageNet-200 and ImageNet-Renditions.

|            |            |            |            |                                          |                   |                         |            |
|------------|------------|------------|------------|------------------------------------------|-------------------|-------------------------|------------|
| n01820546, | n01833805, | n01843383, | n01847000, | n03649909,                               | n03676483,        | n03710193,              | n03773504, |
| n01855672, | n01860187, | n01882714, | n01910747, | n03775071,                               | n03888257,        | n03930630,              | n03947888, |
| n01944390, | n01983481, | n01986214, | n02007558, | n04086273,                               | n04118538,        | n04133789,              | n04141076, |
| n02009912, | n02051845, | n02056570, | n02066245, | n04146614,                               | n04147183,        | n04192698,              | n04254680, |
| n02071294, | n02077923, | n02085620, | n02086240, | n04266014,                               | n04275548,        | n04310018,              | n04325704, |
| n02088094, | n02088238, | n02088364, | n02088466, | n04347754,                               | n04389033,        | n04409515,              | n04465501, |
| n02091032, | n02091134, | n02092339, | n02094433, | n04487394,                               | n04522168,        | n04536866,              | n04552348, |
| n02096585, | n02097298, | n02098286, | n02099601, | n04591713,                               | n07614500,        | n07693725,              | n07695742, |
| n02099712, | n02102318, | n02106030, | n02106166, | n07697313,                               | n07697537,        | n07714571,              | n07714990, |
| n02106550, | n02106662, | n02108089, | n02108915, | n07718472,                               | n07720875,        | n07734744,              | n07742313, |
| n02109525, | n02110185, | n02110341, | n02110958, | n07745940,                               | n07749582,        | n07753275,              | n07753592, |
| n02112018, | n02112137, | n02113023, | n02113624, | n07768694,                               | n07873807,        | n07880968,              | n07920052, |
| n02113799, | n02114367, | n02117135, | n02119022, | n09472597,                               | n09835506,        | n10565667,              | n12267677. |
| n02123045, | n02128385, | n02128757, | n02129165, |                                          |                   |                         |            |
| n02129604, | n02130308, | n02134084, | n02138441, | Street View StoreFronts. The classes are |                   |                         |            |
| n02165456, | n02190166, | n02206856, | n02219486, |                                          |                   |                         |            |
| n02226429, | n02233338, | n02236044, | n02268443, | • auto shop                              | • dentist         | • hotel                 |            |
| n02279972, | n02317335, | n02325366, | n02346627, | • bakery                                 | • discount store  | • liquor store          |            |
| n02356798, | n02363005, | n02364673, | n02391049, | • bank                                   | • dry cleaner     | • pharmacy              |            |
| n02395406, | n02398521, | n02410509, | n02423022, | • beauty sa-<br>lon                      | • furniture store | • religious institution |            |
| n02437616, | n02445715, | n02447366, | n02480495, | • car dealer                             | • gas station     | • storage fa-<br>cility |            |
| n02480855, | n02481823, | n02483362, | n02486410, | • car wash                               | • gym             | • veterinary care.      |            |
| n02510455, | n02526121, | n02607072, | n02655020, | • cell phone store                       | • hardware store  |                         |            |
| n02672831, | n02701002, | n02749479, | n02769748, |                                          |                   |                         |            |
| n02793495, | n02797295, | n02802426, | n02808440, |                                          |                   |                         |            |
| n02814860, | n02823750, | n02841315, | n02843684, |                                          |                   |                         |            |
| n02883205, | n02906734, | n02909870, | n02939185, |                                          |                   |                         |            |
| n02948072, | n02950826, | n02951358, | n02966193, |                                          |                   |                         |            |
| n02980441, | n02992529, | n03124170, | n03272010, |                                          |                   |                         |            |
| n03345487, | n03372029, | n03424325, | n03452741, |                                          |                   |                         |            |
| n03467068, | n03481172, | n03494278, | n03495258, |                                          |                   |                         |            |
| n03498962, | n03594945, | n03602883, | n03630383, | DeepFashion Remixed. The classes are     |                   |                         |            |

- short sleeve top
- long sleeve top
- short sleeve outerwear
- long sleeve
- outerwear
- vest
- sling
- shorts
- trousers
- skirt
- short sleeve dress
- long sleep dress
- vest dress
- sling dress.

Size (small, moderate, or large) defines how much of the image the article of clothing takes up. Occlusion (slight, medium, or heavy) defines the degree to which the object is occluded from the camera. Viewpoint (front, side/back, or not worn) defines the camera position relative to the article of clothing. Zoom (no zoom, medium, or large) defines how much camera zoom was used to take the picture.

## References

- [1] Jia Deng, Wei Dong, Richard Socher, Li jia Li, Kai Li, and Li Fei-Fei. ImageNet: A large-scale hierarchical image database. CVPR 2009. 8
- [2] Shanghua Gao, Ming-Ming Cheng, Kai Zhao, Xinyu Zhang, Ming-Hsuan Yang, and Philip H. S. Torr. Res2net: A new multi-scale backbone architecture. IEEE transactions on pattern analysis and machine intelligence, 2019. 1
- [3] Shanghua Gao, Ming-Ming Cheng, Kai Zhao, Xin-Yu Zhang, Ming-Hsuan Yang, and Philip H.S. Torr. Res2net: A new multi-scale backbone architecture. IEEE Transactions on Pattern Analysis and Machine Intelligence, 2019. 2
- [4] Kaiming He, Xiangyu Zhang, Shaoqing Ren, and Jian Sun. Deep residual learning for image recognition. corr abs/1512.03385 (2015), 2015. 3
- [5] Dan Hendrycks, Kevin Zhao, Steven Basart, Jacob Steinhardt, and Dawn Song. Natural adversarial examples. arXiv, abs/1907.07174, 2019. 1
- [6] Kimin Lee, Kibok Lee, Jinwoo Shin, and Honglak Lee. Network randomization: A simple technique for generalization in deep reinforcement learning. ICLR, 2020. 2
- [7] Bee Lim, Sanghyun Son, Heewon Kim, Seungjun Nah, and Kyoung Mu Lee. Enhanced deep residual networks for single image super-resolution. Proceedings of the IEEE conference on computer vision and pattern recognition workshops pages 136–144, 2017. 2
- [8] Lucas Theis, Wenzhe Shi, Andrew Cunningham, and Ferenc Huszár. Lossy image compression with compressive autoencoders. arXiv preprint arXiv:1703.00395, 2017. 2
- [9] Haotao Wang, Tianlong Chen, Zhangyang Wang, and Kede Ma. I am going mad: Maximum discrepancy competition for comparing classifiers adaptively. International Conference on Learning Representation, 2020. 1
- [10] Richard Zhang, Phillip Isola, Alexei A Efros, Eli Shechtman, and Oliver Wang. The unreasonable effectiveness of deep features as a perceptual metric. CVPR 2018. 2

| Represented Distribution Shifts |                                                                                                                              |
|---------------------------------|------------------------------------------------------------------------------------------------------------------------------|
| ImageNet-Renditions             | artistic renditions (cartoons, graffiti, embroidery, graphics, origami, paintings, sculptures, sketches, tattoos, toys, ...) |
| DeepFashion Remixed             | occlusion, size, viewpoint, zoom                                                                                             |
| StreetView StoreFronts          | camera, capture year, country                                                                                                |

Table 8: Various distribution shifts represented in our three new benchmarks. ImageNet-Renditions is a new test set for ImageNet trained models measuring robustness to various object renditions. DeepFashion Remixed and StreetView StoreFronts each contain a training set and multiple test sets capturing a variety of distribution shifts.

|            | Training set | Testing images                                      |
|------------|--------------|-----------------------------------------------------|
| ImageNet-R | 1281167      | 30000                                               |
| DFR        | 48000        | 42640, 7440, 28160, 10360, 480, 11040, 10520, 10640 |
| SVSF       | 200000       | 10000, 10000, 10000, 8195, 9788                     |

Table 9: Number of images in each training and test set. ImageNet-R training set refers to the ILSVRC 2012 training set [1]. DeepFashion Remixed test sets are: in-distribution, occlusion - none/slight, occlusion - heavy, size - small, size - large, viewpoint - frontal, viewpoint - not-worn, zoom-in - medium, zoom-in - large. StreetView StoreFronts test sets are: in-distribution, capture year - 2018, capture year - 2017, camera system - new, country - France.

Figure 2: Parallel augmentation with Noise2Net. We collapse batches to the channel dimension to ensure that different transformations are applied to each image in the batch. Feeding images into the network in the standard way would result in the same augmentation being applied to each image, which is undesirable. The function is a Res2Net block with all convolutions replaced with grouped convolutions.
